# Supplementary material for: Changes in the fine-scale genetic structure of Finland through the 20th century
Source: PubMed Central journal article supplement (PMC7932171; doi:10.1371/journal.pgen.1009347), 2021-03-04
Supplement: pgen.1009347.s025.pdf [file pgen.1009347.s025.pdf]

**S2 Table. Pairwise-F<sub>ST</sub> values ( $\times 10^5$ ) between ancestor candidate groups and reference groups of refset 10 (lower triangular) and their standard errors (upper triangular).**

|                            | Ancestor groups |                |             |          |           |           |             | Reference groups (Level 10) |                  |                  |                  |            |             |             |               |             |                     |
|----------------------------|-----------------|----------------|-------------|----------|-----------|-----------|-------------|-----------------------------|------------------|------------------|------------------|------------|-------------|-------------|---------------|-------------|---------------------|
|                            | A-Southwest     | A-West_Lapland | A-N_Karelia | A-Kainuu | A-Bothnia | A-Kuusamo | A-Evacuated | R10-Southwest               | R10-East_Lapland | R10-West_Lapland | R10-Savo-Karelia | R10-Kainuu | R10-Bothnia | R10-Kuusamo | R10-Evacuated | R10-Kokkola | R10-Central_Finland |
| <b>A-Southwest</b>         | -               | 4              | 4           | 6        | 6         | 7         | 6           | 1                           | 11               | 6                | 5                | 8          | 5           | 7           | 4             | 5           | 6                   |
| <b>A-West_Lapland</b>      | 271             | -              | 5           | 7        | 9         | 7         | 8           | 5                           | 11               | 6                | 6                | 8          | 7           | 7           | 6             | 8           | 8                   |
| <b>A-N_Karelia</b>         | 366             | 262            | -           | 3        | 8         | 5         | 5           | 4                           | 10               | 6                | 1                | 5          | 7           | 5           | 3             | 7           | 5                   |
| <b>A-Kainuu</b>            | 530             | 383            | 209         | -        | 10        | 6         | 8           | 7                           | 12               | 8                | 4                | 4          | 9           | 6           | 6             | 8           | 7                   |
| <b>A-Bothnia</b>           | 227             | 333            | 406         | 565      | -         | 11        | 10          | 7                           | 14               | 10               | 9                | 11         | 7           | 11          | 8             | 8           | 10                  |
| <b>A-Kuusamo</b>           | 531             | 367            | 305         | 326      | 570       | -         | 9           | 8                           | 12               | 9                | 6                | 8          | 9           | 5           | 7             | 10          | 9                   |
| <b>A-Evacuated</b>         | 282             | 308            | 242         | 428      | 396       | 471       | -           | 7                           | 14               | 9                | 6                | 9          | 9           | 10          | 6             | 9           | 9                   |
| <b>R10-Southwest</b>       | 6               | 266            | 360         | 522      | 222       | 524       | 278         | -                           | 12               | 6                | 5                | 8          | 5           | 8           | 5             | 5           | 6                   |
| <b>R10-East_Lapland</b>    | 554             | 229            | 490         | 596      | 615       | 523       | 572         | 557                         | -                | 13               | 11               | 13         | 14          | 12          | 11            | 14          | 14                  |
| <b>R10-West_Lapland</b>    | 379             | 162            | 466         | 605      | 457       | 589       | 472         | 369                         | 497              | -                | 7                | 10         | 8           | 9           | 7             | 9           | 9                   |
| <b>R10-Savo-Karelia</b>    | 409             | 286            | 26          | 201      | 440       | 302       | 296         | 404                         | 514              | 497              | -                | 5          | 8           | 6           | 4             | 7           | 6                   |
| <b>R10-Kainuu</b>          | 558             | 408            | 235         | 8        | 579       | 358       | 453         | 546                         | 618              | 632              | 219              | -          | 10          | 8           | 7             | 10          | 8                   |
| <b>R10-Bothnia</b>         | 255             | 385            | 462         | 619      | 33        | 624       | 425         | 251                         | 661              | 505              | 498              | 637        | -           | 9           | 7             | 8           | 8                   |
| <b>R10-Kuusamo</b>         | 545             | 374            | 305         | 336      | 574       | 57        | 481         | 538                         | 538              | 602              | 302              | 363        | 639         | -           | 7             | 10          | 9                   |
| <b>R10-Evacuated</b>       | 248             | 254            | 150         | 338      | 333       | 385       | 118         | 238                         | 503              | 415              | 185              | 362        | 371         | 392         | -             | 7           | 6                   |
| <b>R10-Kokkola</b>         | 269             | 328            | 384         | 526      | 214       | 534       | 390         | 267                         | 582              | 472              | 405              | 542        | 338         | 544         | 343           | -           | 9                   |
| <b>R10-Central_Finland</b> | 275             | 299            | 212         | 357      | 356       | 414       | 300         | 268                         | 545              | 454              | 226              | 380        | 397         | 423         | 160           | 367         | -                   |
