# Supplementary material for: Changes in the fine-scale genetic structure of Finland through the 20th century
Source: PubMed Central journal article supplement (PMC7932171; doi:10.1371/journal.pgen.1009347), 2021-03-04
Supplement: pgen.1009347.s026.pdf [file pgen.1009347.s026.pdf]

**S3 Table. Ancestry proportions for single-origin simulations categorized into expected and unexpected ancestry.**

Column 'Expected ancestry' shows which reference groups were considered the closest to the corresponding ancestor group, and the 'Total expected ancestry' sums over the expected ancestries. Unexpected ancestry was defined as everything else except the expected and the average contribution of those groups is shown in column 'Average unexpected ancestry'. Column 'No shrink' shows the values of the raw ancestry estimates and column 'Shrink <5%' shows the results after shrinking the individual ancestry estimates below 5% to zero and rescaling the remaining non-zero ancestry proportions back to 100%.

| Single-origin ancestor group | Expected ancestry                     | Total expected ancestry |            | Average unexpected ancestry |            |
|------------------------------|---------------------------------------|-------------------------|------------|-----------------------------|------------|
|                              |                                       | No shrink               | Shrink <5% | No shrink                   | Shrink <5% |
| <b>Refset 6</b>              |                                       |                         |            |                             |            |
| A-Southwest                  | R6-Southwest                          | 0.892                   | 0.980      | 0.022                       | 0.004      |
| A-Bothnia                    | R6-Bothnia                            | 0.865                   | 0.963      | 0.027                       | 0.007      |
| A-N_Karelia                  | R6-Savo-Karelia                       | 0.891                   | 0.986      | 0.022                       | 0.003      |
| A-Kainuu                     | R6-Kainuu                             | 0.826                   | 0.896      | 0.035                       | 0.021      |
| A-Kuusamo                    | R6-Kuusamo                            | 0.882                   | 0.974      | 0.024                       | 0.005      |
| A-Lapland                    | R6-West_Lapland                       | 0.611                   | 0.672      | 0.078                       | 0.066      |
| A-Evacuated                  | R6-Savo-Karelia                       | 0.624                   | 0.690      | 0.075                       | 0.062      |
| <b>Refset 10</b>             |                                       |                         |            |                             |            |
| A-Southwest                  | R10-Southwest                         | 0.846                   | 0.979      | 0.017                       | 0.002      |
| A-Bothnia                    | R10-Bothnia,<br>R10-Kokkola           | 0.859                   | 0.987      | 0.018                       | 0.002      |
| A-N_Karelia                  | R10-Savo-Karelia                      | 0.742                   | 0.880      | 0.029                       | 0.013      |
| A-Kainuu                     | R10-Kainuu                            | 0.826                   | 0.950      | 0.019                       | 0.006      |
| A-Kuusamo                    | R10-Kuusamo                           | 0.833                   | 0.950      | 0.019                       | 0.006      |
| A-Lapland                    | R10-West_Lapland,<br>R10-East_Lapland | 0.655                   | 0.769      | 0.043                       | 0.029      |
| A-Evacuated                  | R10-Evacuated                         | 0.749                   | 0.904      | 0.028                       | 0.011      |
