# Supplementary material for: Changes in the fine-scale genetic structure of Finland through the 20th century
Source: PubMed Central journal article supplement (PMC7932171; doi:10.1371/journal.pgen.1009347), 2021-03-04
Supplement: pgen.1009347.s027.pdf [file pgen.1009347.s027.pdf]

**S4 Table. Range of the birth years (Min and Max) and the mean birth years of the reference groups.**

Mann-Whitney p-value corresponds to a test between the focal group and the union of the rest of the groups at that refset.

|                                   | Min  | Max  | Mean | Mann-Whitney<br>p-value |
|-----------------------------------|------|------|------|-------------------------|
| <b><i>Refset 2</i></b>            |      |      |      |                         |
| R2-West                           | 1923 | 1987 | 1953 | 0.09                    |
| R2-East                           | 1923 | 1987 | 1954 | 0.09                    |
| <b><i>Refset 6</i></b>            |      |      |      |                         |
| R6-Southwest                      | 1924 | 1983 | 1952 | 0.05                    |
| R6-West_Lapland                   | 1928 | 1987 | 1952 | 0.28                    |
| R6-Savo_Karelia                   | 1923 | 1986 | 1953 | 0.68                    |
| R6-Kainuu                         | 1933 | 1985 | 1953 | 0.68                    |
| K6-Bothnia                        | 1923 | 1985 | 1956 | 0.04                    |
| R6-Kuusamo                        | 1928 | 1984 | 1955 | 0.07                    |
| <b><i>Refset 10</i></b>           |      |      |      |                         |
| R10-Southwest                     | 1924 | 1983 | 1951 | 0.18                    |
| R10-West_Lapland                  | 1928 | 1977 | 1952 | 0.62                    |
| R10-Savo_Karelia                  | 1924 | 1986 | 1953 | 0.40                    |
| R10-Kainuu                        | 1933 | 1985 | 1953 | 0.59                    |
| K10-Bothnia                       | 1925 | 1985 | 1955 | 0.03                    |
| R10-Kuusamo                       | 1928 | 1984 | 1955 | 0.02                    |
| R10-Evacuated                     | 1925 | 1981 | 1946 | 4.3E-07                 |
| R10-Kokkola                       | 1932 | 1981 | 1953 | 0.72                    |
| R10-Central_Finland               | 1925 | 1987 | 1954 | 0.49                    |
| R10-East_Lapland                  | 1930 | 1973 | 1955 | 0.18                    |
| <b><i>Ancestor candidates</i></b> |      |      |      |                         |
| A-Southwest                       | 1926 | 1987 | 1954 | 0.01                    |
| A-Lapland                         | 1928 | 1982 | 1954 | 0.12                    |
| A-N_Karelia                       | 1923 | 1987 | 1951 | 0.06                    |
| A-Kainuu                          | 1930 | 1987 | 1954 | 0.18                    |
| A-Bothnia                         | 1928 | 1978 | 1951 | 0.49                    |
| A-Kuusamo                         | 1933 | 1985 | 1954 | 0.44                    |
| A-Evacuated                       | 1924 | 1967 | 1942 | 1.7E-09                 |
