# Supplementary material for: Changes in the fine-scale genetic structure of Finland through the 20th century
Source: PubMed Central journal article supplement (PMC7932171; doi:10.1371/journal.pgen.1009347), 2021-03-04
Supplement: pgen.1009347.s028.pdf [file pgen.1009347.s028.pdf]

**S5 Table.** Number of study individuals excluded or included after each filtering step.

| <b>Processing steps</b>                       | <b>Excluded</b> | <b>Included</b> |
|-----------------------------------------------|-----------------|-----------------|
| Starting number of samples                    | ---             | 23431           |
| Variant-missigness > 0.005,  Heteroz.  > 0.04 | 493             | 22938           |
| Samples on bad quality genotyping plates      | 138             | 22800           |
| Born abroad                                   | 446             | 22354           |
| 3rd degree relatives                          | 3635            | 18719           |
| Chr 21 missigness > 0.1                       | 4               | 18715           |
| Missing birth municipality                    | 216             | 18499           |
| Born in municipality of Karjala               | 5               | 18494           |
| 1000G PCA outliers                            | 31              | 18463           |
