# Supplementary material for: Changes in the fine-scale genetic structure of Finland through the 20th century
Source: PubMed Central journal article supplement (PMC7932171; doi:10.1371/journal.pgen.1009347), 2021-03-04
Supplement: pgen.1009347.s029.pdf [file pgen.1009347.s029.pdf]

**S6 Table. Number of reference candidates excluded or included after the steps of reference group identification process.**

The numbers in parentheses refer to the number of populations excluded or included.

| Step                     | Threshold | Refset 2 |          | Threshold | Refset 6 |           | Threshold | Refset 10 |           |
|--------------------------|-----------|----------|----------|-----------|----------|-----------|-----------|-----------|-----------|
|                          |           | Exlcuded | Remained |           | Exlcuded | Remained  |           | Exlcuded  | Remained  |
| 1. Starting level        |           |          | 2741 (2) |           |          | 2741 (15) |           |           | 2741 (15) |
| 2. Initial ancestry      |           |          |          |           |          |           |           |           |           |
| 3. Identity proportions  |           |          |          |           |          |           |           |           |           |
| 4. Population exclusions | < 0.50    | 0 (0)    | 2741 (2) | < 0.50    | 1081 (5) | 1660 (10) | < 0.50    | 1081 (5)  | 1660 (10) |
|                          |           |          |          | < 0.70    | 560 (4)  | 1100 (6)  |           |           |           |
| 5. Candidate exclusions  | < 0.95    | 1266 (0) | 1475 (2) | < 0.70    | 63 (0)   | 1037 (6)  | < 0.70    | 408 (0)   | 1252 (10) |
| 6. Geographic outliers   |           | 3 (0)    | 1472 (2) |           | 11 (0)   | 1027 (6)  |           | 16 (0)    | 1236 (10) |
